# Supplementary material for: Toward a Typology of Displacements in the Context of Slow-Onset Environmental Degradation. An Analysis of Hazards, Policies, and Mobility Patterns
Source: MDPI journal article supplement (doi:10.3390/su131810235), 2021-09-14
Supplement: s1 [file s1]

## Supplementary Materials: The CliMig bibliographic database

Compiled at the Institute of Geography of the University of Neuchâtel (Switzerland), the CliMig bibliographic database is the first comprehensive collection of resources which specifically concentrates on migration, the environment, and climate change. The project consists of a fully searchable version of the bibliography on the WEB that is continuously updated with new publications. It aims to provide a free major hub for researchers on this important topic worldwide. It could subsequently be completed with direct access to non-copyrighted PDF documents, statistical data and metadata, ongoing research projects, etc. CliMig uses the most advanced bibliographic research technologies to identify new publications, but the selection of materials, entries, and keyword attribution are done manually, ensuring scientific accuracy and coherence. CliMig is the culmination of professional data-gathering in five stages:

### 1. Literature monitoring

The literature watch uses traditional sources (publishers' catalogues, e-alerts, group lists and discussions, newsletters, etc.) to monitor scientific literature. Tools such as Google Scholar alerts, Feedinformer, the Old Reader, Update Scanner, Queryfeed and editors' alerts are added to the monitoring system in order to filter and locate grey literature (reports, working-papers, conference proceedings, etc.). The database welcomes published material submitted directly by authors or colleagues.

### 2. Selection of topics

To ensure coherence and comprehensiveness, references are included only if they focused on—or bring significant insights into—the following topics:

- Population displacement potentially caused by environmental change
- Displacement as a coping strategy due to environmental change
- Perception/representation of the migration/environment nexus
- Policies and legal issues related to migration and environmental change

In principle, the database does not include references focused on mobility in the context of post-disaster relief (e.g. cell phone data to monitor displacement), the impact of migration on the environment, the links between conflicts and environment, displacement linked to development/infrastructure projects, amenity migration (environment as a pull factor), vulnerability in general, and environmental change if unrelated to displacement of people.

### 3. Selection of relevant types of literature to be included

The CliMig database is focused on original research material. The selection of grey literature is based on IPCC procedure<sup>1</sup>. The following types of publications are included:

- Articles in scientific (peer-reviewed) journals (journal article)
- Books published by scientific publishers (book)
- Chapters of edited books published by scientific publishers (book chapter)
- Reports from scientific (peer-reviewed) research projects (report)
- Working papers based on scientific (peer-reviewed) research projects (report)

---

<sup>1</sup> [https://www.ipcc.ch/site/assets/uploads/2018/02/FS\\_ipcc\\_assess.pdf](https://www.ipcc.ch/site/assets/uploads/2018/02/FS_ipcc_assess.pdf)

- Synthesis or research reports by NGOs – Administrations, UN bodies, etc. if they are based on original empirical work or represent a synthesis not available elsewhere (report)
- Special issues of ‘large public’ reviews, journals, or encyclopedias can be included in the database if they bring additional insights.

The database does not include magazine and newspaper articles, leaflets, advocacy documents, websites, blogs, entries in encyclopedias/dictionaries, or syntheses that do not bring original information.

## 4. Implementation of specific keywords

CliMig keywords are assigned on the basis of a uniform procedure for all publications, and manually entered to ensure scientific accuracy and clarity. For further details and usage, see: [https://www.unine.ch/geographie/Migration\\_and\\_Climate\\_Change](https://www.unine.ch/geographie/Migration_and_Climate_Change).

## 5. Daily maintenance of CliMig

We work in collaboration with the Swiss Forum for Migration and Population (SFM), which uses the information-management platform Delicious to upload potential articles for CliMig. After articles of primary relevance to CliMig are selected, all references and keywords are entered into Endnote Desktop for researchers using Endnote Online. It takes roughly half a day per week to keep CliMig updated and maintained.

With a total of 1193 papers at the end of 2016, this bibliographical database is a unique resource providing a transparent overview of the field of migration and environment research. It allows for comparisons of various sets of meta-analysis on topics of migration and environment studies, both globally and over time. Four families of keywords are used: “Area”, “Type - Method”, “Focus”, and “Environmental hazard”. The origin (country) of the author and the funding are also recorded.

| Area                                                                                  | Type – Method                                                                                                                                                                                           | Focus                                                               | Environmental hazard                                                            |
|---------------------------------------------------------------------------------------|---------------------------------------------------------------------------------------------------------------------------------------------------------------------------------------------------------|---------------------------------------------------------------------|---------------------------------------------------------------------------------|
| <b>World</b><br>Studies covering the whole world or without geographic specification. | <b>Overview</b><br>Synthesis of existing literature or studies dealing with conceptual issues (no empirical case study) – Also includes empirical work on the representation of CC (i.e. in the media). | <b>Gender</b><br>Studies dealing with gender issues                 | <b>SLR</b><br>Sea level rise                                                    |
| <b>Asia</b>                                                                           | <b>type1</b><br>Ecological models based on area characteristics (spatial analysis) <sup>2</sup>                                                                                                         | <b>Perception</b><br>Representation and perception of actors        | <b>Hurricane</b>                                                                |
| <b>Europe</b>                                                                         | <b>type2</b><br>Multilevel analysis based on area and individual characteristics                                                                                                                        | <b>Migadapt</b><br>Migration as an adaptation response              | <b>Flood</b>                                                                    |
| <b>Africa</b>                                                                         | <b>type3</b><br>Analysis of individual data based on large sample surveys (>100)                                                                                                                        | <b>DRR / EWS</b><br>Disaster Risk Reduction / Early Warning Systems | <b>Drought</b>                                                                  |
| <b>North America</b><br>USA + Canada                                                  | <b>type4</b><br>Historical analogues                                                                                                                                                                    | <b>Trapped</b><br>Studies dealing with immobility                   | <b>Rainfall</b>                                                                 |
| <b>Latin America</b><br>South America + Central America + Caribbean                   | <b>type5</b><br>Indexes of vulnerability, hotspot identification, scenarios, regional case studies, etc.                                                                                                | <b>Statelessness</b>                                                | <b>Other</b><br>Wildfire, landslides, etc. Also if no specific type is studied. |

<sup>2</sup> Including economic models (general equilibrium, e.g.).

|                                                            |                                                                                                            |                                                                   |  |
|------------------------------------------------------------|------------------------------------------------------------------------------------------------------------|-------------------------------------------------------------------|--|
| <b>Oceania</b><br>Australia, New-Zealand + Pacific Islands | <b>type6</b><br>Qualitative field case studies using ethnographic methods and small samples questionnaires | <b>Law</b><br>Studies dealing with juridical aspects and policies |  |
|------------------------------------------------------------|------------------------------------------------------------------------------------------------------------|-------------------------------------------------------------------|--|

## Supplementary Materials: References

For this explorative study, we focused our analysis on the articles that can be identified as case-studies<sup>3</sup> with a focus on slow-onset environmental degradations (hurricanes and floods have been excluded). A set of 321 articles therefore constitutes the bibliographic base for this study.

---

<sup>3</sup> A case study is here defined as an empirical research that makes use of of first hand data for which the methodology of analysis can be identified (excluding for example synthesis, state of the art, policy briefs, or strictly descriptive collections of data, etc...) (based on Piguet 2010).

1. Abel, G., M. Brottrager, J. Crespo Cuaresma & R. Muttarak (2018) Climate, conflict and forced migration. *Department of Economics, Working Paper* 272.
2. Adams, H. (2016) Why populations persist: mobility, place attachment and climate change. *Population and Environment*, 37, 429–448.
3. Adams, H. & S. Kay (2019) Migration as a human affair: Integrating individual stress thresholds into quantitative models of climate migration. *Environmental Science & Policy*, 93, 129-138.
4. Adri, N. & D. Simon (2017) A tale of two groups: focusing on the differential vulnerability of “climate-induced” and “non-climate-induced” migrants in Dhaka City. *Climate and Development*, 1-16.
5. Afifi, T. 2008a. Egypt: Case Study Report for the EACH-FOR Project. United Nations University EHS.
6. ---. 2008b. Niger: Case Study Report for the EACH-FOR Project. United Nations University EHS.
7. --- (2011) Economic or environmental migration? The push factors in Niger. *International Migration*, 49, 95-124.
8. Afifi, T., R. Govil, P. Sakdapolrak & K. Warner. 2012. Climate change, vulnerability and human mobility: Perspectives of refugees from the East and Horn of Africa. UNU-EHS.
9. Afifi, T., E. T. Liwenga & L. Kwezi (2013) Rainfall-induced crop failure, food insecurity and out-migration in Same-Kilimanjaro, Tanzania. *Climate and Development*, 6, 53-60.
10. Afifi, T. & K. Warner (2008) The impact of environmental degradation on migrations flows across countries. *United Nations University - EHS - Working Paper*.
11. Ahmet, I. & S. Deniz. 2011. International migration in the Mashriq countries: past trends, future potentials and determinants – possible implications for environmental migration? In *Migration and Global Environmental Change*, ed. Foresight. London: Government Office for Science UK.
12. Ali, F., T. A. Khan, A. Alamgir & M. A. Khan (2018) Climate Change-Induced Conflicts in Pakistan: From National to Individual Level. *Earth Systems and Environment*, 2, 573-599.
13. Alscher, S. 2010. Environmental factors in Mexican migration: The cases of Chiapas and Tlaxcala. In *Environment, Forced Migration and Social Vulnerability*, eds. T. Afifi & J. Jäger, 171-185.
14. Amorim, L., F. Santos, F. Costa, M. Roxo, M. Valente, L. Nunes & Á. Silva (2014) Historical evidence for climate driven migrations in portuguese fishing community. *International Journal of Global Warming*, 6 (1).
15. Andersen, L., L. Lund & D. Verner. 2011. Migration and Climate Change. In *Reducing Poverty Protecting Livelihoods, and Building Assets in a Changing Climate: Social Implications of Climate Change of Latin America and Caribbean*, ed. D. Verner, 195-218. Washington: The World Bank.
16. Anthoff, D., P. Nicholls, R. S. Tol & A. Vafeidis (2006) Global and regional exposure to large rises in sea-level: a sensitivity analysis. *Tyndall centre for climate change research - Working Paper*.

17. Antwi-Agyei, P., A. J. Dougill, L. C. Stringer & S. N. A. Codjoe (2017) Adaptation opportunities and maladaptive outcomes in climate vulnerability hotspots of northern Ghana. *Climate Risk Management*.
18. Arenstam Gibbons, S. J. & R. J. Nicholls (2006) Island abandonment and sea-level rise: An historical analog from the Chesapeake Bay, USA. *Global Environmental Change*, 16, 40-47.
19. Arnall, A. & U. Kothari (2015) Challenging climate change and migration discourse: Different understandings of timescale and temporality in the Maldives. *Global Environmental Change*, 31, 199-206.
20. Ashan, R., S. Karuppannan & J. Kellet (2011) Climate Migration and Urban Planning System: A Study of Bangladesh. *Environmental Justice*, 4, 163-170.
21. Awuor, C. B., V. A. Orindi & A. O. Adwera (2008) Climate change and coastal cities: the case of Mombasa, Kenya. *Environment and Urbanization*, 20, 231-242.
22. Babagana, M., U. Alkali, A. Abubakar, A. Gujja, I. Umar & Y. Mairo (2018) Socio economic impacts of desertification on local communities in Yusufari local government area, Yobe State, Nigeria. *International Journal of Agriculture, Environment and BioResearch*, 3.
23. Backhaus, A., I. Martinez-Zarzoso & C. Muris (2015) Do climate variations explain bilateral migration? A gravity model analysis. *IZA Journal of Migration*, 4, 3.
24. Baez, J., G. Caruso, V. Mueller & C. Niu (2016) Droughts augment youth migration in Northern Latin America and the Caribbean. *Climatic Change*, 1-13.
25. Banerjee, S., J. Y. Gerlitz & B. Hoermann. 2011. Labour migration as a response strategy to water hazards in the Hindu Kush-Himalayas. Kathmandu: International Centre for Integrated Mountain Development.
26. Barbieri, A., E. Domingues, B. Queiroz, R. Ruiz, J. Rigotti, J. Carvalho & M. Resende (2010) Climate change and population migration in Brazil's Northeast: scenarios for 2025–2050. *Population & Environment*, 31, 344-370.
27. Barbieri, A. F. & U. E. C. Confalonieri. 2011. Climate change, migration and health: exploring potential scenarios of population vulnerability in Brazil. In *Migration and Climate Change*, eds. E. Pigué, A. Pécoud & P. de Guchteneire, 49-73. Cambridge: Cambridge University Press.
28. Bari, S. (2018) Waiting for politics at the mercy of river: case study of an enduring community. *Disaster Prevention and Management: An International Journal*, 0, null.
29. Barnett, J. 2012. On the risks of engineering mobility to reduce vulnerability to climate change: Insights from a small island state. In *Climate Change And Human Mobility. Global Challenges to the Social Sciences*, ed. K. a. K. F.-O. Hastrup, 169-189. Cambridge Cambridge University Press.
30. Barrios, S., L. Bertinelli & E. Strobl (2006) Climatic change and rural–urban migration: The case of sub-Saharan Africa. *Journal of Urban Economics*, 60, 357-371.
31. Barua, P. & S. H. Rahman (2017) Indigenous Knowledge Practices for Climate Change Adaptation in the Southern Coast of Bangladesh. *IUP Journal of Knowledge Management*, 15, 44-62.
32. Bassett, T. & M. Turner (2007) Sudden Shift or Migratory Drift? FulBe Herd Movements to the Sudano-Guinean Region of West Africa. *Human Ecology*, 35, 33-49.
33. Beine, M. & C. Parsons (2013) Climatic factors as determinants of International Migration. *Working Papers - International Migration Institute - University of Oxford*.

34. BELL, A., R. DUGGLEBY III & A. KINCH (2016) Vulnerabilities Of Coastal Communities Resulting From Climate Change: A Case Study Of San Mateo, Belize. *International Journal of Safety and Security Engineering*, 6, 582-588.
35. Bernzen, A., J. C. Jenkins & B. Braun (2019) Climate Change-Induced Migration in Coastal Bangladesh? A Critical Assessment of Migration Drivers in Rural Households under Economic and Environmental Stress. *Geosciences*, 9, 51.
36. Bilsborrow, R. (1990) Land Use, Migration, and Natural Resource Deterioration: The Experience of Guatemala and the Sudan. *Population and Development Review*, 16, 125-147.
37. Bilsborrow, R. E. (1992) Rural poverty, migration, and environment in developing countries: Three case studies. *World Bank Policy Research Working Paper*.
38. Birkenholtz, T. (2012) Network political ecology. *Progress in Human Geography*, 36, 295-315.
39. Biswas, J. D., M. Elahi & B. Mahmud (2015) Environmental Migration from Coastal Area to Urban Centers: A Case Study of Mohammadpur Slums, Dhaka, Bangladesh. *International Journal of Environmental Protection and Policy*, 3, 40-44.
40. Black, R. 1998. *Refugees, environment and development*. London: Longman.
41. Black, R., D. Kniveton & K. Schmidt-Verkerk (2011) Migration and climate change: towards an integrated assessment of sensitivity. *Environment and Planning A*, 43, 431-450.
42. Bleibaum, F. 2008. Senegal: Case Study Report for the EACH-FOR Project. United Nations University EHS.
43. Blitz, B. K. (2011) Statelessness and Environmental-Induced Displacement: Future Scenarios of Deterritorialisation, Rescue and Recovery Examined. *Mobilities*, 6.
44. --- (2014) Location Security and Environmental-Induced Displacement: A Case Study of the Riverine Islands in Bangladesh. *Refuge*, 29, 63-73.
45. Bohra-Mishra, P. & D. S. Massey. 2011. Environmental degradation and out-migration: New evidence from Nepal. In *Migration and climate change*, eds. E. Piguet, A. Pécoud & P. de Guchteneire, 74-101. Cambridge: Cambridge University Press.
46. Bohra-Mishra, P., M. Oppenheimer & S. M. Hsiang (2014) Nonlinear permanent migration response to climatic variations but minimal response to disasters. *Proceedings of the National Academy of Sciences*, 111, 9780-9785.
47. Bordey, F. H., C. I. C. Launio, E. J. Quilang, C. M. Tolentino & N. B. Ogena (2013) Linking Climate Change, Rice Yield and Migration: The Philippine Experience. *Economy and Environment Program for Southeast Asia (EEPSEA) Research Report*.
48. Bose, S. (2013) Sea-level Rise and Population Displacement in Bangladesh: Impact on India. *Maritime Affairs: Journal of the National Maritime Foundation of India*, 9, 62-81.
49. Boyer, F. (2017) Migration et dégradation des terres: un lien non évident. *Liaison Energie Francophonie*, 105, 64-66.
50. Bridie, S., P. Nunn, K. Mulgrew, D. Hine, A. Marks, D. Mahar & L. Tiko (2016) Pacific Islanders' understanding of climate change: Where do they source information and to what extent do they trust it? *Regional Environmental Change*, 1-11.
51. Bronen, R. & F. S. Chapin (2013) Adaptive governance and institutional strategies for climate-induced community relocations in Alaska. *PNAS*, 110.

52. Bronkhorst, S. (2012) Rareté de ressources et conflit entre pasteurs et agriculteurs au Sud-Kordofan, Soudan. *Cultures & Conflits [En ligne]*, 111-132.
53. Brooks, R. H. (1971) Human response to recurrent drought in Northeastern Brazil. *The Professional Geographer*, 23, 40-44.
54. Brunk, K. & D. Gronenbom (2004) Floods, droughts, and migrations: The effects of Late Holocene lake level oscillations and climate fluctuations on the settlement and political history in the Chad basin. *Studien zur Kulturkunde*, 121, 101-132.
55. Buchori, I., A. Pramitasari, A. Sugiri, M. Maryono, Y. Basuki & A. W. Sejati (2018) Adaptation to coastal flooding and inundation: Mitigations and migration pattern in Semarang City, Indonesia. *Ocean & Coastal Management*, 163, 445-455.
56. Bulesheva, D. & A. Joldasov. 2008. Kazakhstan: Case Study Report for the EACH-FOR Project. United Nations University EHS - Case study Report.
57. Bylander, M. (2013) Depending on the Sky: Environmental Distress, Migration, and Coping in Rural Cambodia. *International Migration*.
58. Byravan, S. & S. C. Rajan (2009) The Social Impacts of Climate Change in South Asia. *Journal of Migration and Refugee Issues*, 5.
59. Cai, R., S. Feng, M. Oppenheimer & M. Pytlikova (2016) Climate variability and international migration: The importance of the agricultural linkage. *Journal of Environmental Economics and Management*, 79, 135-151.
60. Castañeda, I. S., S. Mulitza, E. Schefuss, R. A. L. dos Santos, J. S. S. Damsté & S. Scheuten (2009) Wet phases in the Sahara/Sahel region and human migration patterns in North Africa. *Proceedings of the National Academy of Sciences of the United States of America*, 106, 20159-20163.
61. Centre, M. M. N. A. M. 2013. Climate Change and Migration. Exploring the Impacts of Climate Change on People's Livelihoods and Migration in the Greater Mekong Sub-region (GMS). Mekong Migration Network & Asian Migrant Centre,
62. Supported by the Rockefeller Foundation,.
63. Charan, D., M. Kaur & P. Singh. 2017. Customary Land and Climate Change Induced Relocation—A Case Study of Vunidogoloa Village, Vanua Levu, Fiji. In *Climate Change Adaptation in Pacific Countries: Fostering Resilience and Improving the Quality of Life*, ed. W. Leal Filho, 19-33. Cham: Springer International Publishing.
64. Charnley, S. (1997) Environmentally-Displaced Peoples and the Cascade Effect: Lessons from Tanzania. *Human Ecology*, 25, 593-618.
65. Chen, J. & V. Mueller (2018) Coastal climate change, soil salinity and human migration in Bangladesh. *Nature Climate Change*, 8, 981-985.
66. Codjoe, S., F. Nyamedor, J. Sward & D. Dovie (2017) Environmental hazard and migration intentions in a coastal area in Ghana: a case of sea flooding. *Population and Environment*, 39, 128-146.
67. Collier, P. & A. Hoeffler. 2011. Quantitative analysis of determinants of international migration. In *Migration and global environmental change*, ed. Foresight. London: Government Office for Science UK.
68. Coniglio, N. & G. Pesce (2015) Climate variability and international migration: an empirical analysis. *Environment and Development Economics*, 20, 434-468.
69. Connell, J. C. (1990) The Carteret Islands: precedents of the Greenhouse Effect? *Geography Compass*, 75, 152-154.
70. --- (1999) Environmental change, economic development, and emigration in Tuvalu. *Pacific Studies*, 22, 1-20.



71. Costanza, R., I. Kubiszewski, J. Roman & J. Sutton. 2011. Changes in ecosystem services and migration in low-lying coastal areas over the next 50 years. In *Migration and Global Environmental Change*, ed. Foresight. London: Government Office for Science UK.
72. Culver, L. (2012) The Desert and the Garden: Climate as Attractor and Obstacle in the Settlement History of the Western United States. *Global Environment*, 9, 131-159.
73. Curtis, K. & A. Schneider (2011) Understanding the demographic implications of climate change: estimates of localized population predictions under future scenarios of sea-level rise. *Population & Environment*, 33, 28-54.
74. Dallmann, I. & K. Millock (2013) Climate Variability and Internal Migration: A Test on Indian Inter-State Migration. *CES Working Papers*.
75. Das, T. K., S. Haldar, D. Sarkar, M. Borderon, S. Kienberger, I. D. Gupta, S. Kundu & D. Guha-Sapir (2017) Impact of riverbank erosion: A case study. *Australasian Journal of Disaster and Trauma Studies*, 21, 73-81.
76. Dasgupta, S., B. Laplante, C. Maisner, D. Wheeler & J. Yan (2007) The Impact of Sea Level Rise on Developing Countries - A Comparative Analysis. *World Bank Policy Research Working Paper 4136*, 51.
77. Dasgupta, S., B. Laplante, C. Meisner, D. Wheeler & J. Yan (2009) The impact of sea level rise on developing countries : a comparative analysis. *Climatic change*, 93, 379-388.
78. Davis, K. F., A. Bhattachan, P. D'Odorico & S. Suweis (2018) A universal model for predicting human migration under climate change: examining future sea level rise in Bangladesh. *Environmental Research Letters*, 13.
79. de Bruijn, M. & H. van Dijk (2003) Changing population mobility in West Africa: Fulbe pastoralist in Central and South Mali. *African Affairs*, 102, 285-307.
80. De Haan, A., K. Brock & N. Coulibaly (2002) Migration, livelihoods and institutions: contrasting patterns of migration in Mali. *The Journal of Development Studies*, 38, 37-58.
81. Deheza, E. & J. Mora. 2013. Climate change, migration and security; best-practice policy and operational options for Mexico. In *Whitehall Report 1-13*, ed. R. U. S. I. (RUSI). London.
82. Delgado, F. (2017) Recuerdos de la tierra que se secó. Un debate sobre la migración ambiental desde Chalcatzingo | Memories of the land that dried up. Discussing environmental migration from Chalcatzingo. *Relaciones Internacionales*.
83. Djiga, H. (2010) La gouvernance locale à l'épreuve des migrations dues aux changements climatiques : Cas des rapports entre conseils villageois de développement et chefs traditionnels au Burkina Faso dans la gestion des conflits sociaux. *Vertigo - Revue Electronique en Sciences de l'Environnement*, 6.
84. Doevedspeck, M. (2011) The Thin Line Between Choice and Flight: Environment and Migration in Rural Benin. *International Migration*, 49, 50-68.
85. Döös, B. R. (1997) Can large-scale environmental migrations be predicted? *Global Environmental Change*, 7, 41-61.
86. Dossou, K. I. M. R. & B. Glehouenou-Dossou (2007) The vulnerability to climate change of Cotonou (Benin): the rise in sea level. *Environment and Urbanization*, 19, 65-79.

87. Dreier, V. & P. Sow (2015) Bialaba Migrants from the Northern of Benin to Nigeria, in Search of Productive Land—Insights for Living with Climate Change. *Sustainability*, 7, 3175-3203.
88. Dun, O. (2011) Migration and Displacement Triggered by Floods in the Mekong Delta. *International Migration*, 49, 200-223.
89. Durrer, P. 2011. Global warming issues are here : Ethnography of a Motionless Relocation in Kivalina, Alaska. Université de Neuchâtel.
90. Eastin, J. (2018) Climate change and gender equality in developing states. *World Development*, 107, 289-305.
91. Eche, D. 2013. *Land Degradation, Small-Scale Farms' Development, and Migratory Flows in Chiapas Case Study: Tapachula*. Kassel university press,.
92. Edwards, J. B. (2013) The Logistics of Climate-Induced Resettlement: Lessons from the Carteret Islands, Papua New Guinea. *Refugee Survey Quarterly*, 32, 52-78.
93. El Raey, M., K. Dewidar & M. El Hattab (2009) Adaptation to the Impacts of Sea Level Rise in Egypt. *Climate Research*.
94. Entwisle, B., N. E. Williams, A. M. Verdery, R. R. Rindfuss, S. J. Walsh, G. P. Malanson, P. J. Mucha, B. G. Frizzelle, P. M. McDaniel, X. Yao, B. W. Heumann, P. Prasartkul, Y. Sawangdee & A. Jampaklay (2016) Climate shocks and migration: an agent-based modeling approach. *Population and Environment*, 38, 47-71.
95. Etzold, B., A. Ahmed, S. Hassan & S. Neelormi (2013) Clouds gather in the sky, but no rain falls. Vulnerability to rainfall variability and food insecurity in Northern Bangladesh and its effects on migration. *Climate and Development*, 6, 18-27.
96. Ezra, M. (2001a) Demographic Responses to Environmental Stress in the Drought- and Famine-Prone Areas of Northern Ethiopia. *International Journal of Population Geography*, 7, 259-279.
97. ---. 2001b. Ecological degradation, rural poverty, and migration in Ethiopia: a contextual analysis. In *Working Paper 149*. New York: Polical research division, Population Council.
98. Ezra, M. & G. Kiros (2001) Rural out-migration in the drought prone areas of Ethiopia: A multilevel analysis. *International Migration Review*, 35, 749-771.
99. Farbotko, C., E. Stratford & H. Lazrus (2015) Climate migrants and new identities? The geopolitics of embracing or rejecting mobility. *Social & Cultural Geography*, 1-20.
100. Fermin, A. 2008. Migration, Environment and Development in Southeastern Spain. United Nations University EHS - Case study Report.
101. Fermin, A. & I. Molodikova. 2008. The Volga River Basin: The Russian Federation. United Nations University EHS - Case study Report.
102. Findlay, A. (2011) Migrant destinations in an era of environmental change. *Global Environmental Change*, 21, Supplement 1, 50-58.
103. Findley, S. E. (1994) Does drought increase migration? A study of migration from rural Mali during the 1983-85 drought. *International Migration Review*, 28, 539-553.
104. Fishman, R., M. Jain & A. Kishore. 2013. Groundwater depletion, adaptation and migration: evidence from Gujarat, India.
105. Floremont, F. 2013. *Les recits contrastes de la « migration environnementale » : élaboration, usages et effets sur l'action publique*.
106. Gemenne, F. (2010) Tuvalu, un laboratoire du changement climatique? (Tuvalu, a laboratory of climate change?). *Tiers Monde (Third World)*, 4, 89-107.

107. Gemenne, F. & S. S. 2008. Tuvalu and New Zealand: Case Study Report for the EACH-FOR Project. United Nations University EHS - Case study Report.
108. Gila, O. A., A. U. Zaratiegui & V. L. De Maturana Diéguez (2011) Western Sahara: Migration, Exile and Environment. *International Migration*, 49, 146-163.
109. Gilbert, G. & R. McLeman (2010) Household access to capital and its effects on drought adaptation and migration: a case study of rural Alberta in the 1930s. *Population & Environment*, 32, 3-26.
110. Glazouvsky, N. F. & A. S. Shestakov (1994) Migraciones ambientales causadas por la desertización en Asia Central y Rusia. *Ecología política: cuadernos de debate internacional*, 8, 107-115.
111. Gray, C. (2011) Soil quality and human migration in Kenya and Uganda. *Global Environmental Change*, 21, 421-430.
112. Gray, C. & V. Mueller (2012) Drought and Population mobility in Rural Ethiopia. *World Development*, 40, 134-145.
113. Gray, C. & E. Wise (2016) Country-specific effects of climate variability on human migration. *Climatic Change*, 135, 555-568.
114. Grolle, J. (2015) Historical case studies of famines and migrations in the West African Sahel and their possible relevance now and in the future. *Population and Environment*, 1-26.
115. Grothmann, T. & A. Patt (2005) Adaptive capacity and human cognition: The process of individual adaptation to climate change. *Global Environmental Change*, 15, 199-213.
116. Gutmann, M. P., G. D., N. L. & A. P. (2005) Two Population-Environment Regimes in the Great Plains of the United States, 1930-1990. *Population and Environment*, 27, 191-225.
117. Hamilton, L. C., K. Saito, P. A. Loring, R. B. Lammers & H. P. Huntington (2016) Climigration? Population and climate change in Arctic Alaska. *Population and Environment*, 38, 115-133.
118. Hampshire, K. & S. Randall (1999) Seasonal labour migration strategies in the Sahel: Coping with poverty or Optimising Security? *International Journal of Population Geography*, 5, 367-85.
119. Hamza, M., B. El Faskaoui & A. Fermin. 2008. Migration and environmental change in Morocco: The case of rural oasis villages in the Middle Drâa Valley. United Nations University EHS -EACH FOR- Case study Report.
120. Hamza, M. A., B. E. Faskaoui & A. Fermin (2010) Les oasis du Drâa au Maroc. Rupture des équilibres environnementaux et stratégies migratoires. *Hommes et migrations*, 1248, 56-69.
121. Haque, C. E. 1997. *Hazards in a fickle environment: Bangladesh*. Dordrecht: Kluwer Academic Publisher.
122. Haque, C. E. & M. Q. Zaman (1989) Coping with Riverbank Erosion Hazard and Displacement in Bangladesh: Survival Strategies and Adjustment. *Disasters*, 13, 300-314.
123. Harms, A. (2015) Leaving Lohachara: On circuits of emplacement and displacement in the Ganges Delta. *Global Environment*, 8, 62-85.
124. Hauer, M. E. (2017) Migration induced by sea-level rise could reshape the US population landscape. *Nature Climate Change*, 7, 321-+.

125. Haug, R. (2002) Forced Migration processes of return and livelihood construction among pastoralist in Northern Sudan. *Disasters*, 26, 70-84.
126. Heinonen, U. (2006) Environmental Impact on Migration in Cambodia: Water-related Migration from the Tonle Sap Lake Region. *International Journal of Water Resources Development*, 22, 449-462.
127. Henry, S., P. Boyle & E. F. Lambin (2003) Modelling inter-provincial migration in Burkina Faso: The role of socio-demographic and environmental factors. *Applied Geography*, 23, 115-136.
128. Henry, S., V. Piché, D. Ouédraogo & E. F. Lambin (2004a) Descriptive Analysis of the Individual Migratory Pathways According to Environmental Typologies. *Population and Environment*, 25, 397-422.
129. Henry, S., B. Schoumaker & C. Beauchemin (2004b) The impact of rainfall on the first out-migration: A multi-level event-history analysis in Burkina Faso. *Population and Environment*, 25, 423-60.
130. Hoque Mollah, T. & J. Ferdoush (2015) Riverbank Erosion, Population Migration and Rural Vulnerability in Bangladesh (A Case Study on Kazipur Upazila at Sirajgonj District). *Environment and Ecology Research*, 3, 125-131.
131. Hornbeck, R. (2012) The Enduring Impact of the American Dust Bowl: Short- and Long-Run Adjustments to Environmental Catastrophe. *American Economic Review*, 102, 1477-1507.
132. Houli Fourissala, R. & J. Gormo (2013) Changement climatique et migration dans la bande sahélienne du Tchad. *Locus - revista de história*, 18, 159-176.
133. Hugo, G. & Y. Tan. 2013. Mobility and desertification: new evidence from rural household survey in the Minqin Oasis, northwest China. In *Global Change and Resilience Conference (3rd : 2013 : Brno, Czech Republic)*. Czech Republic: Global Change Research Centre AS CR, v.v.i.
134. Hummel, D. (2015) Climate change, land degradation and migration in Mali and Senegal – some policy implications. *Migration and Development*, 1-23.
135. Hutton, D. & C. E. Haque (2004) Human Vulnerability, Dislocation and Resettlement: Adaptation Processes of River-bank Erosion-induced Displacees in Bangladesh. *Disasters*, 28, 41-62.
136. IDMC. 2006. Bangladesh: Minorities increasingly at risk of displacement. A profile of the internal displacement situation. In *IDMC NRC*, ed. I. NRC. Internal Displacement Monitoring Centre - Norwegian Refugee Council.
137. ---. 2013a. Disaster-induced internal displacement in the Philippines. The case of Tropical Storm Washi/Sendong. Internal Displacement Monitoring Centre - Norwegian Refugee Council.
138. ---. 2013b. Technical Paper: The risk of disaster-induced displacement Central American and the Caribbean.
139. ---. 2014. Technical Paper: The risk of disaster-induced displacement South Pacific island states. ed. I. NRC.
140. Imran, M., K. Bakhsh & S. Hassan (2016) Do natural resources and social networks matter in rural-urban migration? Evidence from punjab. *Scientia Agriculturae*, 15, 356-360.
141. Isaacman, S., V. Frias-Martinez & F. Frias-Martinez. 2018. Modeling human migration patterns during drought conditions in La Guajira, Colombia. In *Proceedings*

of the 1st ACM SIGCAS Conference on Computing and Sustainable Societies, 1-9.  
Menlo Park and San Jose, CA, USA: ACM.

142. Ishtiaque, A. & N. Nazem (2016) Household-level disaster-induced losses and rural–urban migration: Experience from world’s one of the most disaster-affected countries. *Natural Hazards*, 1-12.
143. Islam, M. & J. Herbeck (2013) Migration and Translocal Livelihoods of Coastal Small-scale Fishers in Bangladesh. *The Journal of Development Studies*, 1-14.
144. Islam, M. R. (2017) Climate Change, Natural Disasters and Socioeconomic Livelihood Vulnerabilities: Migration Decision Among the Char Land People in Bangladesh. *Social Indicators Research*, 1-19.
145. Janif, S., P. Nunn, P. Geraghty, W. Aalbersberg, F. Thomas & M. Camailakeba (2016) Value of traditional oral narratives in building climate-change resilience: insights from rural communities in Fiji. *Ecology and Society*, 21.
146. Joarder, M. A. & P. W. Miller (2013) Factors affecting whether environmental migration is temporary or permanent: Evidence from Bangladesh. *Global Environmental Change*, 23, 1511-1524.
147. Jones, B. & B. O’Neill (2016) Spatially explicit global population scenarios consistent with the Shared Socioeconomic Pathways. *Environmental Research Letters*, 11, 084003.
148. Jorgenson, A. K. & T. J. Burns (2007) Effects of Rural and Urban Population Dynamics and National Development on Deforestation in Less-Developed Countries, 1990–2000. . *Sociological Inquiry* 77, 460-482.
149. Joseph, G. & Q. Wodon. 2012. Is internal migration in Yemen driven by climate or socio-economic factors? Results from gravity model. Washington, DC: The World Bank.
150. Joseph, G., Q. Wodon, B. Blankespoor & A. Liverani. 2012. Is Climate Change Likely to Lead to Higher Net Internal Migration in Yemen? , ed. Mimeo. Washington: The World Bank.
151. Jülich, S. (2011) Drought Triggered Temporary Migration in an East Indian Village. *International Migration*, 49, 189-199.
152. Juul, K. 2002. Post Drought Migration and the Quest for Recognition; Asserting and securing of claims among Fulani pastoralists in northern Senegal. In *Negotiating Property - Processes of Vindication of Land Claims in Developing countries*, ed. K. a. L. Juul, C. London: Heinemann.
153. Kabir, M. E., S. Serrao-Neumann, P. Davey, M. Hossain & M. T. Alam (2018) Drivers and temporality of internal migration in the context of slow-onset natural hazards: Insights from north-west rural Bangladesh. *International Journal of Disaster Risk Reduction*, 31, 617-626.
154. Kadirbeyoglu, Z. 2008. Turkey: Case study Report for the EACH FOR project. United Nations University EHS.
155. Karim, M. F. & N. Mimura (2008) Impacts of climate change and sea level rise on cyclonic storm surge floods in Bangladesh. *Global Environmental Change*, 18, 490-500.
156. Keya, M. K. & S. M. R. Harun (2007) Riverbank Erosion Induced Stress and Coping of Displaced Women in Bangladesh. *Empowerment*, 14.
157. Khakimov, P. S. & M. S. Mahmadbekov. 2008. Republic of Tajikistan: Case study Report for EACH FOR project. United Nations University EHS.

158. Kidane, A. (1989) Demographic consequences of the 1984-1985 Ethiopian Famine. *Demography*, 26, 515-522.
159. Kniveton, D., K. Schmidt-Verkerk, C. Smith & R. Black. 2008. *Climate change and migration: Improving methodologies to estimate flows*. Geneva: IOM (International Organization for Migration).
160. Kniveton, D., C. Smith & S. Wood (2011) Agent-based model simulations of future changes in migration flows for Burkina Faso. *Global Environmental Change*, 21, Supplement 1, 34-40.
161. Kniveton, D. R., C. Smith & R. Black (2012) Emerging migration flows in a changing climate in dryland Africa. *Nature Climate Change*, 2, 444-447.
162. Kolmannskog, V. (2009) Climate change, disaster, displacement and migration: initial evidence from Africa. *New Issues in Refugee Research - UNHCR Research Paper*, 180.
163. --- (2010) Climate Change, Human Mobility, and Protection: Initial Evidence from Africa. *Refugee Survey Quarterly*, 29, 103-119.
164. Konseiga, A. (2006) Household migration decisions as survival strategy : The case of Burkina Faso. *Journal of African Economies*, 16, 198-233.
165. Koubi, V., G. Spilker, L. Schaffer & T. Böhmelt (2016) The role of environmental perceptions in migration decision-making: evidence from both migrants and non-migrants in five developing countries. *Population and Environment*, 38, 134-163.
166. Krishnapillai, M. V. 2017. Climate-Friendly Adaptation Strategies for the Displaced Atoll Population in Yap. In *Climate Change Adaptation in Pacific Countries: Fostering Resilience and Improving the Quality of Life*, ed. W. Leal Filho, 101-117. Cham: Springer International Publishing.
167. Kumar, A. & S. S. Luna (2018) Migrant community of Nijhum Dwip: comparative importance of livelihood capitals to adapt to this island. *Journal of the Asiatic Society of Bangladesh, Science*, 44, 127-136.
168. Laforge, J. M. L. & R. McLeman (2013) Social capital and drought-migrant integration in 1930s Saskatchewan. *The Canadian Geographer / Le Géographe canadien*.
169. Lei, Y., M. Finlayson, R. Thwaites & G. Shi (2013) Migration drivers in mountain regions in the context of climate change: A case study in Shangnan County of China. *Chinese Journal of Population Resources and Environment*, 1-10.
170. Leighton, M. 2006. Desertification and Migration. In *Governing Global Desertification*, eds. P. M. Johnson, K. Mayrand & M. Paquin, 43-58. London: Ashgate.
171. Liehr, S., L. Drees & D. Hummel. 2016. Migration as Societal Response to Climate Change and Land Degradation in Mali and Senegal. In *Adaptation to Climate Change and Variability in Rural West Africa*, eds. A. J. Yaro & J. Hesselberg, 147-169. Cham: Springer International Publishing.
172. Locke, J. T. (2009) Climate change-induced migration in the Pacific region: sudden crisis and long-term developments. *The Geographical Journal*, 175, 171-180.
173. López-Carr, D. (2012) Agro-ecological drivers of rural out-migration to the Maya Biosphere Reserve, Guatemala. *Environmental Research Letters*, 7, 045603.
174. Majumdar, S. (2018) Impact of Flood and Bank Erosion on Human Life: A Case Study of Panchanandapur at Malda, West Bengal, India. *Impact of Flood and Bank*

*Erosion on Human Life: A Case Study of Panchanandapur at Malda, West Bengal, India*, 8.

175. Maldonado, J., C. Shearer, R. Bronen, K. Peterson & H. Lazrus (2013) The impact of climate change on tribal communities in the US: displacement, relocation, and human rights. *Climatic Change*, 1-14.
176. Mallick, B. & J. Vogt (2013) Population displacement after cyclone and its consequences: empirical evidence from coastal Bangladesh. *Natural Hazards*, 1-22.
177. Marchiori, L., J. F. Maystadt & I. Schumacher (2012) The impact of weather anomalies on migration in sub-Saharan Africa. *Journal of Environmental Economics and Management*, 63, 355-374.
178. Marino, E. (2012) The long history of environmental migration: Assessing vulnerability construction and obstacles to successful relocation in Shishmaref, Alaska. *Global Environmental Change*.
179. Marino, E. & P. Schweitzer. 2009. Talking and Not Talking About Climate Change in Northwestern Alaska. In *Anthropology and Climate Change*, 217. Walnut Creek: Left Coast Press.
180. Maurel, M. & M. Tuccio (2016) Climate Instability, Urbanisation and International Migration. *The Journal of Development Studies*, 52, 735-752.
181. Mavhura, E., A. Collins & P. P. Bongo (2017) Flood vulnerability and relocation readiness in Zimbabwe. *Disaster Prevention and Management: An International Journal*, 26, 41-54.
182. McAdam, J. 2011. Refusing Refuge in the Pacific: (De)constructing Climate-Induced Displacement in International Law. In *Migration and Climate Change*, eds. E. Piguet, A. Pécout & P. de Guchteneire, 102-137. Cambridge: Cambridge University Press
183. McGranahan, G., D. Balk & B. Anderson (2006) Low coastal zone settlements. *Tiempo*, 59, 23-26.
184. --- (2007) The rising tide: assessing the risks of climate change and human settlements in low elevation coastal zones. *Environment and Urbanization*, 19, 17-37.
185. McLeman, R. (2006) Migration out of 1930s rural eastern Oklahoma: Insights for climate change research. *Great Plains Quarterly*, 1.
186. ---. 2009. Climate Change and adaptive human migration: lessons from rural North America. In *Adapting to Climate Change: thresholds, values, governance*, eds. N. Adger, I. Lorenzoni & K. O'Brien. Cambridge: Cambridge University Press.
187. McLeman, R., S. Herold, Z. Reljic, M. Sawada & D. McKenney (2010) GIS-based modeling of drought and historical population change on the Canadian Prairies. *Journal of Historical Geography*, 36, 43-56.
188. McLeman, R. & L. M. Hunter (2010) Migration in the context of vulnerability and adaptation to climate change: insights from analogues. *Wiley Interdisciplinary Reviews: Climate Change*, 1, 450-461.
189. McLeman, R., D. Mayo, E. Strebeck & B. Smit (2008) Drought adaptation in rural eastern Oklahoma in the 1930s: Lessons for climate change adaptation research. *Mitigation and Adaptation Strategies for Global Change*, 13, 379-400.
190. McLeman, R., M. Moniruzzaman & N. Akter (2017) Environmental influences on skilled worker migration from Bangladesh to Canada. *The Canadian Geographer / Le Géographe canadien*.

191. McLeman, R. & S. Ploeger (2012) Soil and its influence on rural drought migration: insights from Depression-era Southwestern Saskatchewan, Canada. *Population & Environment*, 33, 304-332.
192. McLeman, R. & B. Smit (2006) Migration as an adaptation to climate change. *Climatic Change*, 76, 31-53.
193. McNamara, K. & H. Jacot Des Combes (2015) Planning for Community Relocations Due to Climate Change in Fiji. *International Journal of Disaster Risk Science*, 6.
194. Meze-Hausken, E. (2000) Migration caused by climate change: How vulnerable are people in dryland areas? *Mitigation and Adaptation Strategies for Global Change*, 5, 379-406.
195. Milan, A. & R. Ho (2013) Livelihood and migration patterns at different altitudes in the Central Highlands of Peru. *Climate and Development*, 6, 69-76.
196. Milan, A. & S. Ruano (2014) Rainfall variability, food insecurity and migration in Cabricán, Guatemala. *Climate and Development*, 1-8.
197. Missirian, A. & W. Schlenker (2017) Asylum applications respond to temperature fluctuations. *Science*, 358, 1610-1614.
198. Molla, N. A., K. A. Mollah, G. Ali, W. Fungladda, O. V. Shipin, W. Wongwit & H. Tomomi (2014) Quantifying disease burden among climate refugees using multidisciplinary approach: A case of Dhaka, Bangladesh. *Urban Climate*, 8, 126-137.
199. Morrissey, J. W. 2012. Contextualising Links Between Migration and Environmental Change in Northern Ethiopia. In *Climate Change and Human Mobility: Global Challenges to the Social Sciences*, eds. K. Hastrup & K. V. Olwig, 110-146. Cambridge: Cambridge University Press.
200. --- (2013) Understanding the relationship between environmental change and migration: The development of an effects framework based on the case of northern Ethiopia. *Global Environmental Change*, 23, 1501-1510.
201. Mortimore, M. (2010) Adapting to drought in the Sahel: Lessons for climate change. *Wiley Interdisciplinary Reviews: Climate Change*, 1, 134-143.
202. Mortreux, C. & J. Barnett (2009) Climate change, migration and adaptation in Funafuti, Tuvalu. *Global Environmental Change*, 19, 105-112.
203. Mounkaila, H. (2002) De la migration circulaire à l'abandon du territoire local dans le Zarmaganda (Niger). *Revue européenne des migrations internationales*, 18, 161-187.
204. --- (2004) Migration, chefferie et acces aux ressources foncières dans le Canton de Torodi (Ouest du Niger). *Cahiers d'Outre Mer*, 57, 137-154.
205. Mueller, V., C. Gray & K. Kosec (2014) Heat stress increases long-term human migration in rural Pakistan. *Nature Clim. Change*, advance online publication.
206. Munshi, K. (2003) Networks in the modern economy: Mexican migrants in the U.S. labor market *Quarterly Journal of Economics*, 118, 549-599.
207. Murali, J. & T. Afifi (2013) Rainfall variability, food security and human mobility in the Janjgir-Champa district of Chhattisgarh state, India. *Climate and Development*, 6, 28-37.
208. Murgida, A. M. (2013) Cambios socio-ambientales: desplazamientos de las poblaciones históricamente postergadas en el chaco-salteño. *Cuadernos de Antropología*, 9.



209. Murphy, D. W. A. (2014) Theorizing climate change, (im)mobility and socio-ecological systems resilience in low-elevation coastal zones. *Climate and Development*, 1-18.
210. N., I. 2016. To leave or not to leave? Climate change, exit, and voice on a Pacific Island. In *SEF WORKING PAPER*. Wellington, New-Zealand: School of Economics and Finance.
211. Nawrotzki, R., J. DeWaard, M. Bakhtsiyarava & J. Ha (2016a) Climate shocks and rural-urban migration in Mexico: exploring nonlinearities and thresholds. *Climatic Change*, 1-16.
212. Nawrotzki, R., D. Runfola, L. Hunter & F. Riosmena (2016b) Domestic and International Climate Migration from Rural Mexico. *Human Ecology*, 1-13.
213. Nawrotzki, R. J. & J. DeWaard (2018) Putting trapped populations into place: climate change and inter-district migration flows in Zambia. *Regional Environmental Change*, 18, 533-546.
214. Nawrotzki, R. J., A. M. Schlak & T. A. Kugler (2016c) Climate, migration, and the local food security context: introducing Terra Populus. *Population and Environment*, 38, 164-184.
215. Neumann, B., A. T. Vafeidis, J. Zimmermann & R. J. Nicholls (2015a) Future Coastal Population Growth and Exposure to Sea-Level Rise and Coastal Flooding - A Global Assessment. *PLOS ONE*, 10, e0118571.
216. Neumann, K., D. Sietz, H. Hilderink, P. Janssen, M. Kok & H. van Dijk (2015b) Environmental drivers of human migration in drylands – A spatial picture. *Applied Geography*, 56, 116-126.
217. New, M., K. Anderson, F. Fung & P. Thornton. 2011. The possible impacts of high levels of climate change in 2060 and implications for migration. In *Migration and Global Environmental Change*, ed. Foresight. London: Government Office for Science.
218. Nguyen, V. K., C. T. Nguyen & K. Van der Geest. 2012. Where the Rain Falls: Viet Nam case study. Bonn: United Nations University-Institute for Environment & Human Security.
219. Ngwenya, B. N., O. T. Thakadu, L. Magole & M. J. Chimbari (2016) Memories of environmental change and local adaptations among molapo farming communities in the Okavango Delta, Botswana—A gender perspective. *Acta Tropica*.
220. Nicholls, R. J. (2004) Coastal flooding and wetland loss in the 21st century: changes under the SRES climate and socio-economic scenarios. *Global Environmental Change*, 14, 69-86.
221. Nicholls, R. J., N. Marinova, J. A. Lowe, S. Brown, P. Vellinga, D. de Gusmão, J. Hinkel & R. S. J. Tol (2011) Sea-level rise and its possible impacts given a 'beyond 4°C world' in the twenty-first century. *Phil. Trans. R. Soc. A* 369, 161-181.
222. Niven, R. J. & D. K. Bardsley (2013) Planned retreat as a management response to coastal risk: a case study from the Fleurieu Peninsula, South Australia. *Reg Environ Change*, 13, 193–209.
223. Noy, I. (2017) To leave or not to leave? Climate change, exit, and voice on a Pacific Island. *CESifo Economic Studies*, 63, 403-420.
224. O'Neill, S. J. & S. Graham (2016) (En)visioning place-based adaptation to sea-level rise. *Geo: Geography and Environment*, 3.
225. Ocello, C., A. Petrucci, M. Testa & D. Vignoli (2014) Environmental aspects of internal migration in Tanzania. *Population and Environment*, 1-10.

226. Ojima, R., J. Vilton Costa & R. Kissya Calixta (2014) "Minha vida é andar por esse país...": a emigração recente no semiárido setentrional, políticas sociais e meio ambiente. *REMHU, Rev. Interdiscip. Mobil. Hum.*, 22.
227. Olimova, S. & M. Olimov. 2012. Environmental Degradation, Migration, Internal Displacement, and Rural Vulnerabilities in Tajikistan. 48. Geneva: IOM.
228. Pedersen, J. (1995) Drought, Migration and Population Growth in the Sahel: The Case of the Malian Gourma: 1900-1991. *Population Studies*, 49, 111-126.
229. Penning-Rowsell, E. C., P. Sultana & P. Thompson. 2011. Population movement in response to climate- related hazards in Bangladesh: the 'last resort'. In *Migration and Global Environmental Change*, ed. Foresight. London: Government Office for Science UK.
230. Penning-Rowsell, E. C., P. Sultana & P. M. Thompson (2013) The 'last resort'? Population movement in response to climate-related hazards in Bangladesh. *Environmental Science & Policy*, 27, Supplement 1, 44-59.
231. Perumal, N. (2018) "The place where I live is where I belong": community perspectives on climate change and climate-related migration in the Pacific island nation of Vanuatu *Island Studies Journal*, 13, 45-64.
232. Polk, L. (2018) American Polynesia, Rising Seas and Relocation. *The Asia-Pacific Journal* 16, 1-16.
233. Poncelet, A. (2010) Bangladesh, un pays fait de catastrophes. La vulnérabilité environnementales et la migration forcée. *Hommes et migrations*, 1284, 16-27.
234. Poncelet, A., F. Gemenne, M. Martiniello & H. Boussetta. 2010. A Country Made for Disaster: Environmental Vulnerability and Forced Migration in Bangladesh. In *Environment, Forced Migration and Social Vulnerability*, eds. T. Afifi & J. Jägger, 211-222. Berlin: Springer.
235. Poston, D., L. Zhang, D. Gotcher & Y. Gu (2009) The effect of climate change on migration: United States, 1995-2000. *Social Science Research*, 38, 743-53.
236. Prasain, S. (2018) Climate change adaptation measure on agricultural communities of Dhye in Upper Mustang, Nepal. *Climatic Change*.
237. Radel, C., B. Schmook, L. Carte & S. Mardero. Migración y cambio climático en el noroeste de Nicaragua: una visión crítica y de género. In *Transformaciones ambientales en America Latina. Temas emergentes, estrategias y acciones*, 43-69. Cuernavaca: Universidad Nacional Autónoma de México.
238. Rademacher-Schulz, C., T. Afifi, K. Warner, T. Rosenfeld, A. Milan, B. Etzold & P. Sakdapolrak. 2012. Rainfall variability, food security and human mobility. An approach for generating empirical evidence. In *InterSecTions 'Interdisciplinary Security ConnecTions' Publication Series of UNU-EHS*. Bonn: UNU-EHS.
239. Rademacher-Schulz, C., B. Schraven & E. Mahama (2013) Time matters: shifting seasonal migration in Northern Ghana in response to rainfall variability and food insecurity. *Climate and Development*, 6, 46-52.
240. Rahman, M. K., B. K. Paul, A. Curtis & T. W. Schmidlin (2015) Linking Coastal Disasters and Migration: A Case Study of Kutubdia Island, Bangladesh. *The Professional Geographer*, 67, 218-228.
241. Rain, D. 1999. *Eaters of the Dry Season – Circular Labor Migration in the West African Sahel*. Boulder Colorado: Westview Press.

242. Rasmussen, K., W. May, T. Birk, M. Matak, O. Mertz & D. Yee (2012) Climate change on three Polynesian outliers in the Solomon Islands: Impacts, vulnerability and adaptation. *Danish Journal of Geography-Geografisk Tidsskrift*, 109, 1-13.
243. Reenberg, A., T. Birch-Thomsen, O. Mertz, B. Fog & S. Christiansen (2008) Adaptation of Human Coping Strategies in a Small Island Society in the SW Pacific—50 Years of Change in the Coupled Human–Environment System on Bellona, Solomon Islands. *Human Ecology*, 36, 807-819.
244. Reuveny, R. (2008) Ecomigration and Violent Conflict: Case Studies and Public Policy Implications *Human Ecology*, 36, 1-13.
245. Reuveny, R. & W. H. Moore (2009) Does environmental degradation influence migration? Emigration to developed countries in the late 1980s and 1990s. *Social Science Quarterly*, 90, 461-479.
246. Richter, I. (2015) Gone with(in) the Chesapeake Bay's waters: Reflections on society's thresholds to migration given island sinking. *Global Environment*, 8, 152-176.
247. Rivers III, L., S. Mattes, S. T. Marquart-Pyatt, A. Ligmann-Zielinska, L. S. Olabisi & J. Du (2018) Climate-induced migration: using mental models to explore aggregate and individual decision-making AU - Whitley, Cameron Thomas. *Journal of Risk Research*, 21, 1019-1035.
248. Romankiewicz, C. & M. Doeveenspeck. 2015. Climate and Mobility in the West African Sahel: Conceptualising the Local Dimensions of the Environment and Migration Nexus. In *Grounding Global Climate Change*, eds. H. Greschke & J. Tischler, 79-100. Springer Netherlands.
249. Roquet, D. (2008) Partir pour mieux durer: la migration comme réponse à la sécheresse au Sénégal? *Espace, Populations, Sociétés*, 1, 37-53.
250. Roy Chowdhury, A. & K. Lahiri-Dutt (2016) The geophagous peasants of Kalahandi: De-peasantisation and artisanal mining of coloured gemstones in India. *The Extractive Industries and Society*, 3, 703–715.
251. Roy, M., D. Hulme & F. Jahan (2013) Contrasting adaptation responses by squatters and low-income tenants in Khulna, Bangladesh. *Environment and Urbanization*, 25, 157-176.
252. Rukuh, S., K. Kunarso & K. Y. Rizki (2012) An overview of future climate-forced migration in Indonesian urban coastal area (Case study: Semarang City). *Jurnal Kajian Pengembangan Perkotaan*, 5.
253. Safrá de Campos, R., M. Bell & E. Charles-Edwards (2016) Collecting and Analysing Data on Climate-related Local Mobility: the MISTIC Toolkit. *Population, Space and Place*, n/a-n/a.
254. Sakdapolrak, P., P. Promburom & A. Reif (2013) Why successful in situ adaptation with environmental stress does not prevent people from migrating? Empirical evidence from Northern Thailand. *Climate and Development*, 6, 38-45.
255. Salauddin, M. & M. Ashikuzzaman (2012) Nature and extent of population displacement due to climate change triggered disasters in south-western coastal region of Bangladesh. *Journal of Climate Change Strategies and Management*, 4, 54-65.
256. Saldaña-Zorrilla, S. & K. Sandberg (2009a) Impact of climate-related disasters on human migration in Mexico: A spatial model. *Climatic Change*, 96, 97-118.

257. --- (2009b) Spatial econometric model of natural disaster impacts on human migration in vulnerable regions of Mexico. *Disasters*, 33, 591-607.
258. Salifu, A.-M. A. 2016. Relocation Based on Slow-Onset Climate-Induced Environmental Change in Keta, Ghana. 166. Walden University.
259. Sánchez, I., Ú. Oswald, G. Díaz, J. Cerano, M. A. Inzunza Ibarra, R. López & J. Villanueva (2012) Forced Migration, Climate Change, Mitigation and Adaptive Policies in Mexico: Some Functional Relationships. *International Migration*, 51, 1-20.
260. Sarker, M. (2015) Environmental change and its impact on migration in Bangladesh.
261. Sarker, S. & M. M. Rahman Trend Analysis of Bank Erosion of Jamuna River and Migration Impact: A Case Study on Teota Union of Shibalaya Upazila. *Journal of Bangladesh Institute of Planners ISSN*, 2075, 9363.
262. Saroar, M. M., J. Routray & W. Leal Filho. 2015. Livelihood Vulnerability and Displacement in Coastal Bangladesh: Understanding the Nexus. In *Climate Change in the Asia-Pacific Region*, ed. W. Leal Filho, 9-31. Springer International Publishing.
263. Schmidt-Verkerk, K. 2009. The Potential Influence of Changing Precipitation and Temperature Patterns on Migratory Behaviour in the State of Zacatecas, Mexico. In *Linking Environmental Change, Migration & Social Vulnerability*, eds. A. Oliver-Smith & X. Shen, 51-60. Bonn: Source 12 - Publication Series of UNU-EHS.
264. Seong, W. O. C., B. A. Hamid & M. S. Habibullah (2015) Intertemporal Changes Of The Influence Of Environmental Degradation On Migration: The Case Between Malaysia And Asia-Pacific Countries. *Kajian Malaysia*, 33.
265. Shearer, C. (2012) The political ecology of climate adaptation assistance: Alaska Natives, displacement, and relocation. *Journal of Political Ecology* 174-183.
266. Shen, S. & T. Binns (2012) Pathways, motivations and challenges: contemporary Tuvaluan migration to New Zealand. *GeoJournal*, 77, 63-82.
267. Shen, S. & F. Gemenne (2011) Contrasted Views on Environmental Change and Migration: the Case of Tuvaluan Migration to New Zealand. *International Migration*, 49, 224-242.
268. Sherbinin, A., M. Levy, S. Adamo, K. MacManus, G. Yetman, V. Mara, L. Razafindrazay, B. Goodrich, T. Srebotnjak, C. Aichele & L. Pistoiesi (2012) Migration and risk: net migration in marginal ecosystems and hazardous areas. *Environmental Research Letters*, 7, 045602.
269. Shestakov, A. & V. Streletsky. 1998. *Mapping of risk areas of environmentally-induced migration in the Commonwealth of Independent States (CIS)*. Geneva [etc.]: IOM International Organization for Migration [etc.].
270. Simatele, D. & M. Simatele (2015) Migration as an adaptive strategy to climate variability: a study of the Tonga-speaking people of Southern Zambia. *Disasters*, n/a-n/a.
271. Sina, D., A. Y. Chang-Richards, S. Wilkinson & R. Potangaroa (2018) What does the future hold for relocated communities post-disaster? Factors affecting livelihood resilience. *International Journal of Disaster Risk Reduction*.
272. Singh, V. (2012) Environmental Migration as Planned Livelihood Among the Rebaris of Western Rajasthan, India. *Global Environment*, 9, 51-73.
273. Smith, C. (2014) Modelling migration futures: development and testing of the Rainfalls Agent-Based Migration Model – Tanzania. *Climate and Development*, 6, 77-91.

274. Smith, R. (2013) Should they stay or should they go? A discourse analysis of factors influencing relocation decisions among the outer islands of Tuvalu and Kiribati. *Journal of New Zealand & Pacific Studies*, 1, 23-39.
275. Sobczak, K. (2008) CHANGES IN THE ENVIRONMENT AND MIGRATION IN SOUTHERN MOROCCO—EXAMPLE OF THE MHAMID OASIS. *Miscellanea geographica*, 239-250.
276. Sow, P., S. A. Adaawen & J. Scheffran (2014) Migration, Social Demands and Environmental Change amongst the Frafra of Northern Ghana and the Biali in Northern Benin. *Sustainability*, 6, 375-398.
277. Sow, P., E. Marmer & J. Scheffran (2015) Between the heat and the hardships. Climate change and mixed migration flows in Morocco. *Migration and Development*, 1-21.
278. Sporton, D., D. Thomas & J. Morrison (1999) Outcomes of social and environmental change in the Kalahari of Botswana: the role of migration. *Journal of Southern African studies*, 25, 441-459.
279. Stafford Smith, M., G. Bastin & V. Chewings. 2011. Environmental and non-environmental drivers of migration from global drylands. In *Migration and global environmental change*, ed. Foresight. London: Government Office for Science UK.
280. Stal, M. 2008. Mozambique: Case study Report for the EACH FOR Project. United Nations University EHS.
281. --- (2011) Flooding and Relocation: The Zambezi River Valley in Mozambique. *International Migration*, 49, 125-145.
282. Stobl, E. & M.-A. Valfort (2013) The Effect of Weather-Induced Internal Migration on Local Labor Markets - Evidence from Uganda. *World Bank Policy Research Working Paper*.
283. Stojanov, R., B. Duží, I. Kelman, D. Němec & D. Procházka (2017) Local perceptions of climate change impacts and migration patterns in Malé, Maldives. *The Geographical Journal*, 183, 370-385.
284. Suckall, N., E. Fraser & P. Forster (2016) Reduced migration under climate change: evidence from Malawi using an aspirations and capabilities framework. *Climate and Development*, 1-15.
285. Swift, J. (1977) Sahelian Pastoralists: Underdevelopment, Desertification, and Famine. *Annual Review of Anthropology*, 6, 457-478.
286. Tacoli, C. (2011 ) Not only climate change: mobility, vulnerability and socio-economic transformations in environmentally fragile areas of Bolivia, Senegal and Tanzania *IIED Human Settlements Working Paper*.
287. Tan, Y., X. Liu & G. Hugo (2015) Exploring relationship between social inequality and adaptations to climate change: evidence from urban household surveys in the Yangtze River delta, China. *Population and Environment*, 36, 400-428.
288. Thiede, B., C. Gray & V. Mueller (2016) Climate variability and inter-provincial migration in South America, 1970–2011. *Global Environmental Change*, 41, 228-240.
289. Thiede, B. C. & C. L. Gray (2017) Heterogeneous climate effects on human migration in Indonesia. *Population and Environment*, 39, 147–172.
290. Thow, A. & M. Blois. 2008. *Climate change and human vulnerability: Mapping emerging trends and risk hotspots for humanitarian actors - Report to the UN Office for Coordination of Humanitarian Affairs*. Geneva: Maplecroft / OCHA / CARE.

291. Turton, D. & P. Turton (1984) Spontaneous resettlement after drought: An Ethiopian example. *Disasters*, 8, 178-189.
292. Tyson, P. D., J. Lee-Thorp, K. Holmgren & J. F. Thackeray (2002) Changing Gradients of Climate Change in Southern Africa during the Past Millennium: Implications for Population Movements. *Climatic Change*, 52, 129-135.
293. Udas, P. B., A. Prakash & C. G. Goodrich (2018) Gendered Vulnerabilities in Diaras - Struggling with Floods in the Gandak River Basin. *Review of women's studies*, 53, 47.
294. United Nations Environment Programme, International Organization for Migration, Office for the Coordination of Humanitarian Affairs & United Nations University. 2011. Climate Change, Conflict and Migration in the Sahel. Geneva.
295. Vafeidis, A., B. Neumann, J. Zimmermann & R. J. Nicholls. 2011. Analysis of land area and population in the low-elevation coastal zone (LECZ). In *Migration and Global Environmental Change*, ed. Foresight. London: Government Office for Science UK.
296. Valdivia, C., A. Seth, J. Gilles, M. Garcia, E. Jimenez, J. Cusicanqui, F. Navia & E. Yucra (2010) Adapting to climate change in Andean ecosystems: Landscapes, capitals, and perceptions shaping rural livelihood strategies and linking knowledge systems. *Annals of the Association of American Geographers*, 100, 818-834.
297. Van der Geest, K. 2011a. *The Dagara farmer at home and away : migration, environment and development in Ghana*. Leiden: African Studies Centre.
298. --- (2011b) North-south migration in Ghana: What role for the environment? *International Migration*, 49, 69-94.
299. Van der Geest, K., A. Vrieling & T. Dietz (2010) Migration and environment in Ghana: A cross-district analysis of human mobility and vegetation dynamics. *Environment & Urbanization*, 22, 107-123.
300. Van der Land, V. & D. Hummel (2013) Vulnerability and the Role of Education in Environmentally Induced Migration in Mali and Senegal. *Ecology and Society*, 18.
301. Vogel, C. H. & T. Binns. 1995. People and drought in South Africa: reaction and migration. In *People and Environment in Africa*, 249-256.
302. Waddell, E. (1989) Observations on the 1972 frosts and subsequent relief programme among the Enga of the Western Highland. *Mountain Research and Development*, 9, 210-223.
303. Walsh, S. J., G. P. Malanson, B. Entwisle, R. R. Rindfuss, P. J. Mucha, B. W. Heumann, P. M. McDaniel, B. G. Frizzelle, A. M. Verdery, N. E. Williams, X. Yao & D. Ding (2013) Design of an agent-based model to examine population–environment interactions in Nang Rong District, Thailand. *Applied Geography*, 39, 183-198.
304. Walsham, M. 2010. *Assessing the Evidence: Environment, Climate Change and Migration in Bangladesh*. Geneva: International Organization for Migration.
305. Wang, K. (1998) Environmental migration and sustainable development A case study of southwest China. *Chinese Geographical Science*, 8, 271-280.
306. Warner, K., T. Afifi, A. d. Sherbinin, S. B. Adamo & C. Ehrhart. 2011. Environmental change and forced migration scenarios: methods and findings from the Nile Delta, Sahel and Mekong Delta. In *Migration and Climate Change*, eds. E. Piguet, A. Pécout & P. De Guchteneire, 188-221. Cambridge: Cambridge University Press.

307. Warner, K., C. Ehrhart, A. de Sherbinin, S. Adamo & T. Chai-Onn. 2009. *In search of shelter: mapping the effects of climate change on human migration and displacement*. CARE/CIESIN/UNHCR/UNU-EHS/World Bank.
308. Weinthal, E., N. Zawahri & J. Sowers (2015) Securitizing Water, Climate, and Migration in Israel, Jordan, and Syria. *International Environmental Agreements: Politics, Law and Economics*, 15, 1-15.
309. Wodon, Q., A., G. Liverani, J. Bougnoux & N. Bougnoux. 2014a. Climate Change and Migration: Evidence from the Middle East and North Africa. Washington DC: The World Bank.
310. Wodon, Q., N. Burger & A. Grant. 2014b. Climate Change, Extreme Weather Events, and Migration: Review of the Literature for Five Arab Countries. In *People on the Move in a Changing Climate. The Regional Impact of Environmental Change on Migration*, eds. E. Piguet & F. Laczkó, 111-134. Springer Netherlands.
311. Wouterse, F. 2006. Survival or accumulation migration and rural households in burkina faso (Thesis). Wageningen Wageningen University.
312. Wright, A. 2017. Environmental degradation as a cause of migration: cautionary tales from Brazil. In *Environmental History of Modern Migrations*, eds. M. Armiero & R. Tucker, 159-176. Oxon: Routledge.
313. Xiao, L., X. Fang & W. Zhao (2018) Famine relief, public order, and revolts: interaction between government and refugees as a result of drought/flood during 1790–1911 in the North China Plain. *Regional Environmental Change*.
314. Xiao, L., X. Fang, J. Zheng & W. Zhao (2015) Famine, migration and war: Comparison of climate change impacts and social responses in North China between the late Ming and late Qing dynasties. *The Holocene*, 25, 900-910.
315. Yang, H., X. Li, Z. Yili & J. B. A. Zehnder. 2004. Environmental - Economic interaction and forces of migration: a case study of three counties in northern China. In *Environmental Change and Its Implications for Population Migration*, eds. J. D. Unruh, M. S. Krol & N. Klot, 267-288. Dordrecht: Kluwer.
316. Ye, Y., X. Fang & M. Aftab U Khan (2012) Migration and reclamation in Northeast China in response to climatic disasters in North China over the past 300 years. *Regional Environmental Change*, 12, 193-206.
317. Zhang, Q. 2008. China (Inner Mongolia): Case study Report for EACH FOR Project. United Nations University EHS.
318. --- (2010) Mongolie intérieure. Désertification, migration et transformation des modes de vie. *Hommes et migrations*, 1248, 42-55.
319. Zhou, H., W. Zhang, Y. Sun & Y. Yuan (2014) Policy options to support climate-induced migration: insights from disaster relief in China. *Mitigation and Adaptation Strategies for Global Change*, 19, 375-389.
320. Zickgraf, C., S. Vigil Diaz Telenti, F. de Longueville, P. Ozer & F. Gemenne. 2016. The Impact of Vulnerability and Resilience to Environmental Changes on Mobility Patterns in West Africa. ed. KNOMAD. World Bankd.
321. Zoomers, A. (2012) Migration as a failure to adapt? How Andean People Cope with Environmental Restrictions and Climate Variability. *Global Environment, Special Issue on Environmental Change and Migration in History*, 104-129.
