# Supplementary material for: Toward a Typology of Displacements in the Context of Slow-Onset Environmental Degradation. An Analysis of Hazards, Policies, and Mobility Patterns
Source: MDPI journal article supplement (doi:10.3390/su131810235), 2021-09-14
Supplement: s1 [file s1]

Archive with 1 entries (1 files):
- sustainability-1358983-supplementary.pdf
